# Supplementary material for: Resting-state network topology and planning ability in healthy adults
Source: bioRxiv or medRxiv preprint supplement (doi:10.1101/696856), 2019-11-03
Supplement: Supplementary file [file media-1.pdf]

**SUPPLEMENTARY MATERIAL**

*Resting-state network topology and planning ability in healthy adults*

**SUPPLEMENTAL TABLE 1 – ASSOCIATIONS BETWEEN TOL REACTION TIME AND SUBNETWORK MEASURES**

| TOL | Model    | B (SE)            | 95% CI (BCa)      | Beta  | P <sub>bca</sub> | R <sup>2</sup> |
|-----|----------|-------------------|-------------------|-------|------------------|----------------|
| RT  | Age      | 95.24 (15.7)      | 61.5, 126.3       | .633  | <.001            |                |
|     | DMN eff. | 10526.9 (4323.0)  | 2840.3, 21273.0   | .253  | .018             | .306           |
|     | Motion   | -16036.7 (6908.2) | -30857.2, -4681.7 | -.224 | .015             |                |
|     | Age      | 89.6 (16.6)       | 55.2, 120.8       | .595  | <.001            |                |
|     | FPN eff  | 5529.6 (4260.6)   | -3457.5, 15153.3  | .144  | .191             | .265           |
|     | Motion   | -15657.5 (7437.8) | -31259.9, -2615.6 | -.219 | .033             |                |
|     | Age      | 85.0 (15.7)       | 50.9, 115.0       | .564  | <.001            |                |
|     | DAN eff  | 2070.8 (3780.8)   | -5147.6, 10618.1  | .064  | .592             | .249           |
|     | Motion   | -14203.2 (6922.0) | -28020.6, -2599.0 | -.198 | .033             |                |
|     | Age      | 93.7 (14.8)       | 63.7, 121.8       | .623  | <.00             |                |
|     | VAN eff. | 7933.9 (4470.2)   | -1231.4, 18587.6  | .214  | .079             | .287           |
|     | Motion   | -18330.8 (6707.7) | -32109.9, -7779.2 | -.256 | .005             |                |
|     | Age      | 90.0 (15.2)       | 57.6, 120.3       | .597  | <.001            |                |
|     | DMN CC   | 10489.0 (4952.2)  | 2139.5, 23408.4   | .230  | .039             | .298           |
|     | Motion   | -16351.0 (6506.0) | -30216.4, -5369.9 | -.228 | .050             |                |
|     | Age      | 88.4 (14.6)       | 59.0, 115.5       | .587  | <.001            |                |
|     | FPN CC   | 8897.0 (4522.2)   | 457.1, 19933.3    | .198  | .077             | .285           |
|     | Motion   | -16146.7 (6698.8) | -29146.9, -5559.5 | -.225 | .055             |                |
|     | Age      | 88.1 (15.0)       | 56.4, 116.4       | .585  | <.001            |                |
|     | DAN CC   | 8506.4 (4564.4)   | 16.0, 18689.4     | .195  | .061             | .283           |
|     | Motion   | -15809.5 (6550.6) | -28949.6, -5382.5 | -.221 | .013             |                |
|     | Age      | 90.0 (14.9)       | 56.9, 117.7       | .596  | <.001            |                |
|     | VAN CC   | 9433.7 (4732.7)   | 686.6, 20753.4    | .210  | .065             | .288           |
|     | Motion   | -17235.9 (6412.6) | -29138.6, -7738.5 | -.241 | .043             |                |

For each analysis, age was entered in model 1, the network measure in model 2 and motion parameters in model 3. Only the results of model 3 are shown here. P-values are bootstrapped using 2000 permutations. Abbreviations: TOL = Tower of London task, RT = reaction time, ACC = accuracy, SE = Standard Error, CI = confidence interval, BCa= Bias corrected and accelerated, DMN = default-mode network, FPN = fronto-parietal network, DAN = dorsal attention network, VAN = ventral attention network. Eff = efficiency, CC = clustering coefficient. Motion was defined as the mean root-mean-squared framewise displacement during the entire resting-state MRI scan.

**SUPPLEMENTAL TABLE 2 – ASSOCIATIONS BETWEEN TOL ACCURACY AND SUBNETWORK MEASURES**

| TOL | Model    | B (SE)       | 95% CI (BCa)  | Beta  | P    | R <sup>2</sup> |
|-----|----------|--------------|---------------|-------|------|----------------|
| ACC | Age      | -0.15 (0.08) | -0.32, -0.01  | -.267 | .071 |                |
|     | DMN eff. | -29.8 (24.2) | -80.3, 23.8   | -.199 | .227 | .061           |
|     | Motion   | -23.7 (28.0) | -70.0, 33.4   | -.092 | .392 |                |
|     | Age      | -0.14 (0.08) | -0.30, -0.003 | -.249 | .094 |                |
|     | FPN eff. | -21.7 (17.5) | -59.5, 12.6   | -.157 | .219 | .047           |
|     | Motion   | -22.8 (29.6) | -73.4, 46.4   | -.089 | .406 |                |
|     | Age      | -0.12 (0.07) | -0.28, 0.03   | -.217 | .129 |                |
|     | DAN eff. | -9.2 (14.1)  | -34.9, 15.3   | -.079 | .528 | .030           |
|     | Motion   | -28.4 (27.7) | -76.1, 36.9   | -.110 | .289 |                |
|     | Age      | -0.12 (0.07) | -0.28, -0.01  | -.227 | .107 |                |
|     | VAN eff. | -8.4 (17.0)  | -39.5, 18.6   | -.063 | .621 | .027           |
|     | Motion   | -25.1 (28.6) | -78.3, 48.6   | -.098 | .350 |                |
|     | Age      | -0.13 (0.07) | -0.30, -0.002 | -.245 | .081 |                |
|     | DMN CC   | -35.1 (23.2) | -84.2, 9.8    | -.215 | .128 | .070           |
|     | Motion   | -21.5 (27.9) | -68.8, 40.8   | -.084 | .422 |                |
|     | Age      | -0.13 (0.08) | -0.27, 0.002  | -.236 | .098 |                |
|     | FPN CC   | -30.0 (22.1) | -76.4, 11.8   | -.186 | .192 | .058           |
|     | Motion   | -22.2 (29.8) | -72.2, 50.3   | -.086 | .436 |                |
|     | Age      | -0.13 (0.08) | -0.286, 0.005 | -.231 | .104 |                |
|     | DAN CC   | -15.1 (20.2) | -66.7, 13.7   | -.158 | .205 | .049           |
|     | Motion   | -24.2 (28.6) | -72.7, 41.0   | -.094 | .376 |                |
|     | Age      | -0.13 (.08)  | -0.30, 0.02   | -.236 | .114 |                |
|     | VAN CC   | -24.8 (21.5) | -70.7, 12.6   | -.153 | .251 | .046           |
|     | Motion   | -21.0 (29.9) | -71.3, -53.0  | .081  | .444 |                |

For each analysis, age was entered in model 1, the network measure in model 2 and motion parameters in model 3. Only the results of model 3 are shown here. P-values are bootstrapped using 2000 permutations. Abbreviations: TOL = Tower of London task, RT = reaction time, ACC = accuracy, SE = Standard Error, CI = confidence interval, BCa= Bias corrected and accelerated, DMN = default-mode network, FPN = fronto-parietal network, DAN = dorsal attention network, VAN = ventral attention network. Eff = efficiency, CC = clustering coefficient. Motion was defined as the mean root-mean-squared framewise displacement during the entire resting-state MRI scan.

**SUPPLEMENTAL TABLE 3 – ASSOCIATIONS BETWEEN TOL REACTION TIME AND SUBNETWORK CONNECTIVITY**

| TOL | Model   | B (SE)            | 95% CI (BCa)      | Beta  | P     | R <sup>2</sup> |
|-----|---------|-------------------|-------------------|-------|-------|----------------|
| RT  | Age     | 90.2 (15.7)       | 55.3, 120.1       | .599  | <.001 |                |
|     | DMN-FPN | 9579.5 (4665.2)   | 1519.4, 20298.9   | .231  | .039  | .298           |
|     | Motion  | -16821.6 (6909.2) | -31410.8, -4733.7 | -.235 | .014  |                |
|     | Age     | 86.3 (15.2)       | 52.0, 115.7       | .573  | <.001 |                |
|     | DMN-DAN | 9525.2 (4733.2)   | 995.2, 19277.1    | .205  | .042  | .288           |
|     | Motion  | -15334.3 (6675.6) | -28806.7, -4974.6 | -.214 | .020  |                |
|     | Age     | 87.9 (15.1)       | 56.2, 117.7       | .584  | <.001 |                |
|     | DMN-VAN | 8566.3 (4350.8)   | 655.4, 17947.4    | .200  | .044  | .285           |
|     | Motion  | -17158.1 (6405.8) | -29479.2, -6933.1 | -.239 | .007  |                |
|     | Age     | 85.5 (15.4)       | 52.4, 115.1       | .568  | <.001 |                |
|     | FPN-DAN | 4867.0 (4388.8)   | -3428.3, 15327.6  | .118  | .256  | .259           |
|     | Motion  | -14770.7 (6970.7) | -27681.9, -4743.9 | -.206 | .024  |                |
|     | Age     | 87.3 (15.4)       | 52.3, 116.5       | .580  | <.001 |                |
|     | FPN-VAN | 6390.7 (4215.2)   | -1399.9, 15910.1  | .151  | .117  | .267           |
|     | Motion  | -16623.6 (6938.9) | -30903.6, -5240.0 | -.232 | .011  |                |
|     | Age     | 89.4 (14.2)       | 58.8, 117.1       | .594  | <.001 |                |
|     | DAN-VAN | 7868.2 (4142.2)   | -32.0, 16651.0    | .188  | .058  | .279           |
|     | Motion  | -16954.7 (6892.0) | -31729.2, -5937.1 | -.237 | .008  |                |

For each analysis, age was entered in model 1, the network measure in model 2 and motion parameters in model 3. Only the results of model 3 are shown here. P-values are bootstrapped using 2000 permutations. Abbreviations: TOL = Tower of London task, RT = reaction time, ACC = accuracy, SE = Standard Error, CI = confidence interval, BCa= Bias corrected and accelerated, DMN-FPN = functional connectivity between the default-mode network and fronto-parietal network, DMN-DAN = functional connectivity between the default mode network and dorsal attention network, DMN-VAN = functional connectivity between the default mode network and ventral attention network FPN-DAN = functional connectivity between the fronto-parietal network and dorsal attention network, FPN-VAN = functional connectivity between the fronto-parietal network and ventral attention network, DAN-VAN = functional connectivity between the dorsal and ventral attention networks. Motion was defined as the mean root-mean-squared framewise displacement during the entire resting-state MRI scan.

**SUPPLEMENTAL TABLE 4 – ASSOCIATIONS BETWEEN TOL ACCURACY AND SUBNETWORK CONNECTIVITY**

| TOL | Model   | B (SE)       | 95% CI (BCa) | Beta  | P    | R <sup>2</sup> |
|-----|---------|--------------|--------------|-------|------|----------------|
| ACC | Age     | -0.13 (0.08) | -0.30, 0.003 | -.243 | .106 |                |
|     | DMN-FPN | -28.7 (22.2) | -75.2, 19.6  | -.192 | .211 | .060           |
|     | Motion  | -21.0 (28.5) | -68.1, 34.6  | -.082 | .447 |                |
|     | Age     | -0.12 (0.07) | -0.28, 0.008 | -.223 | .118 |                |
|     | DMN-DAN | -30.6 (21.8) | -79.9, 13.1  | -.183 | .166 | .058           |
|     | Motion  | -25.1 (28.5) | -78.8, 41.2  | -.098 | .378 |                |
|     | Age     | -0.13 (0.07) | -0.28, 0.02  | -.230 | .107 |                |
|     | DMN-VAN | -25.6 (22.3) | -73.7, 12.5  | -.166 | .243 | .051           |
|     | Motion  | -20.0 (30.2) | -70.8, 45.3  | -.078 | .480 |                |
|     | Age     | -0.12 (0.08) | -0.28, 0.02  | -.215 | .111 |                |
|     | FPN-DAN | -11.7 (16.8) | -46.7, 22.2  | -.080 | .533 | .030           |
|     | Motion  | -27.7 (27.4) | -73.6, 28.9  | -.107 | .423 |                |
|     | Age     | -0.12 (0.08) | -0.29, 0.02  | -.228 | .118 |                |
|     | FPN-VAN | -20.5 (21.2) | -65.7, 15.1  | -.134 | .349 | .041           |
|     | Motion  | -21.0 (30.3) | -70.0, 46.4  | -.082 | .462 |                |
|     | Age     | -0.12 (0.07) | -0.28, 0.02  | -.222 | .111 |                |
|     | DAN-VAN | -10.6 (19.3) | -49.1, 22.2  | -.070 | .587 | .028           |
|     | Motion  | -25.7 (28.7) | -78.8, 40.4  | -.100 | .343 |                |

For each analysis, age was entered in model 1, the network measure in model 2 and motion parameters in model 3. Only the results of model 3 are shown here. P-values are bootstrapped using 2000 permutations. Abbreviations: TOL = Tower of London task, RT = reaction time, ACC = accuracy, SE = Standard Error, CI = confidence interval, BCa= Bias corrected and accelerated, DMN-FPN = functional connectivity between the default-mode network and fronto-parietal network, DMN-DAN = functional connectivity between the default mode network and dorsal attention network, DMN-VAN = functional connectivity between the default mode network and ventral attention network FPN-DAN = functional connectivity between the fronto-parietal network and dorsal attention network, FPN-VAN = functional connectivity between the fronto-parietal network and ventral attention network, DAN-VAN = functional connectivity between the dorsal and ventral attention networks. Motion was defined as the mean root-mean-squared framewise displacement during the entire resting-state MRI scan.
